# Supplementary material for: Immunohistochemical and Histopathological Features of Persistent Gingival Enlargement in Relation to Metal Allergic Sensitisation during Orthodontic Treatment
Source: MDPI journal article supplement (doi:10.3390/ma16010081), 2022-12-22
Supplement: s1 [file s1]

Article

# Immunohistochemical and Histopathological Features of Persistent Gingival Enlargement in Relation to Metal Allergic Sensitisation during Orthodontic Treatment

Martina Zigante <sup>1,2,\*</sup>, Stjepan Spalj <sup>1,2,3</sup>, Jelena Prpic <sup>2,4</sup>, Andrej Pavlic <sup>1,5</sup>, Visnja Katic <sup>1,2</sup> and Koviljka Matusan Ilijas <sup>2,6</sup>

<sup>1</sup> Department of Orthodontics, Faculty of Dental Medicine, University of Rijeka, 51000 Rijeka, Croatia

<sup>2</sup> Clinical Hospital Center Rijeka, 51000 Rijeka, Croatia

<sup>3</sup> Department of Dental Medicine, Faculty of Dental Medicine and Health, J. J. Strossmayer University of Osijek, 31000 Osijek, Croatia

<sup>4</sup> Department of Periodontology, Faculty of Dental Medicine, University of Rijeka, 51000 Rijeka, Croatia

<sup>5</sup> Department of Pediatric Dentistry, Faculty of Dental Medicine, University of Rijeka, 51000 Rijeka, Croatia

<sup>6</sup> Department of General Pathology and Pathological Anatomy, Faculty of Medicine, University of Rijeka, 51000 Rijeka, Croatia

\* Correspondence: [martina.zigante@fdmri.uniri.hr](mailto:martina.zigante@fdmri.uniri.hr)

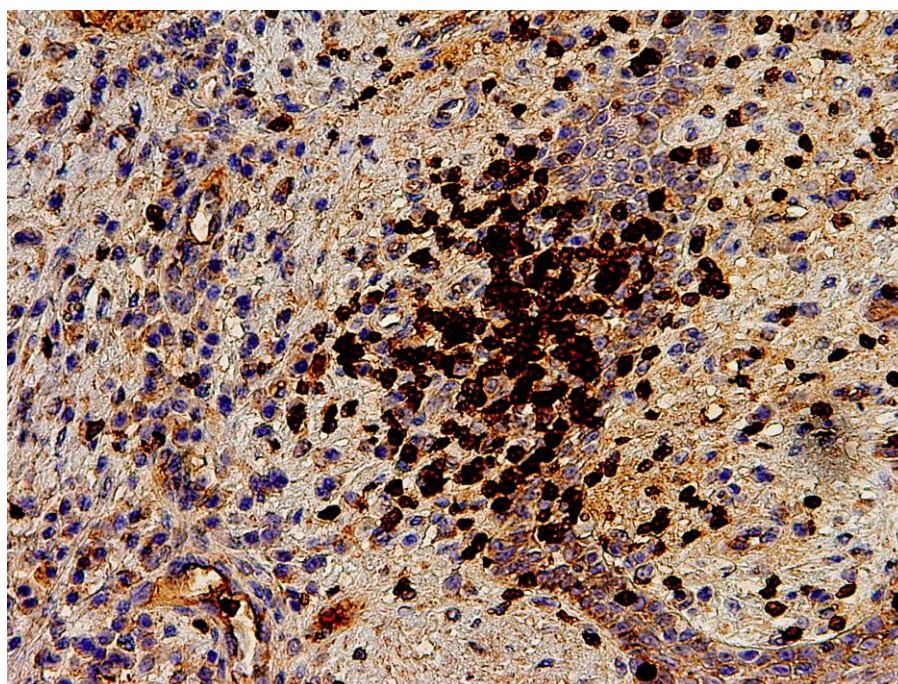

**Figure S1.** Example sample of immuno-staining for T-lymphocytes in non-sensitised patient (Expression of CD3 molecule (T-lymphocytes) is in brown).



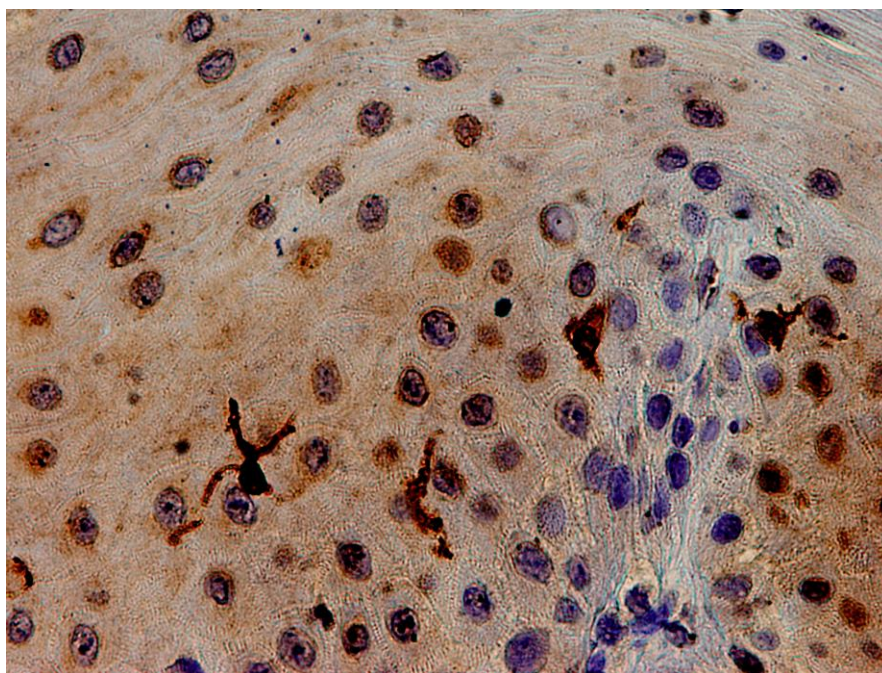

**Figure S2.** Example sample of immuno-staining for Langerhans cells in sensitised patient (Expression of CDa1 molecule (Langerhans cells) is in brown.

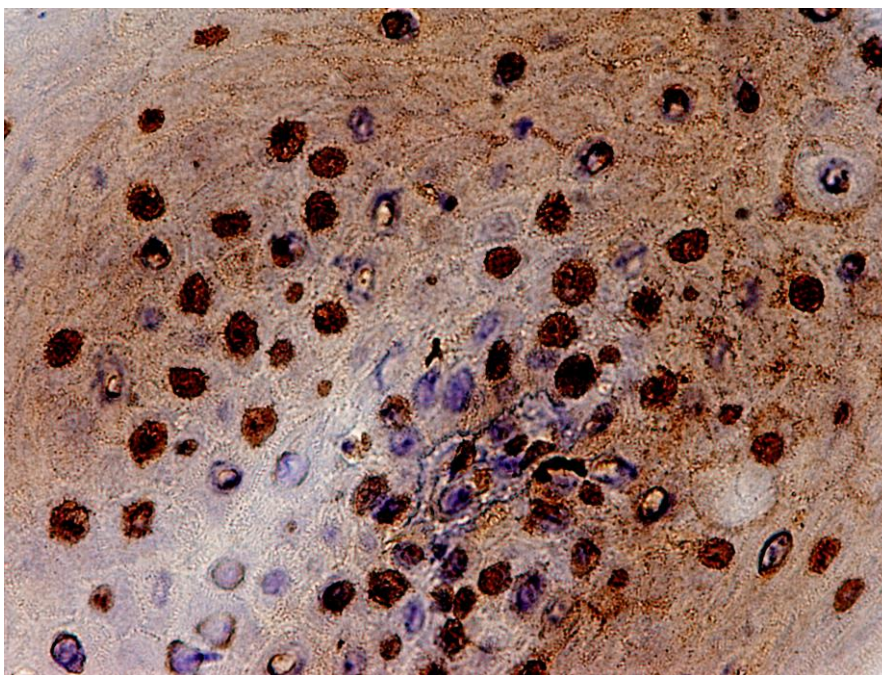

**Figure S3.** Example sample of immuno-staining for T-cytotoxic lymphocytes in sensitised and non-sensitised patient (Expression of CD8 molecule (T-cytotoxic lymphocytes) is in brown.



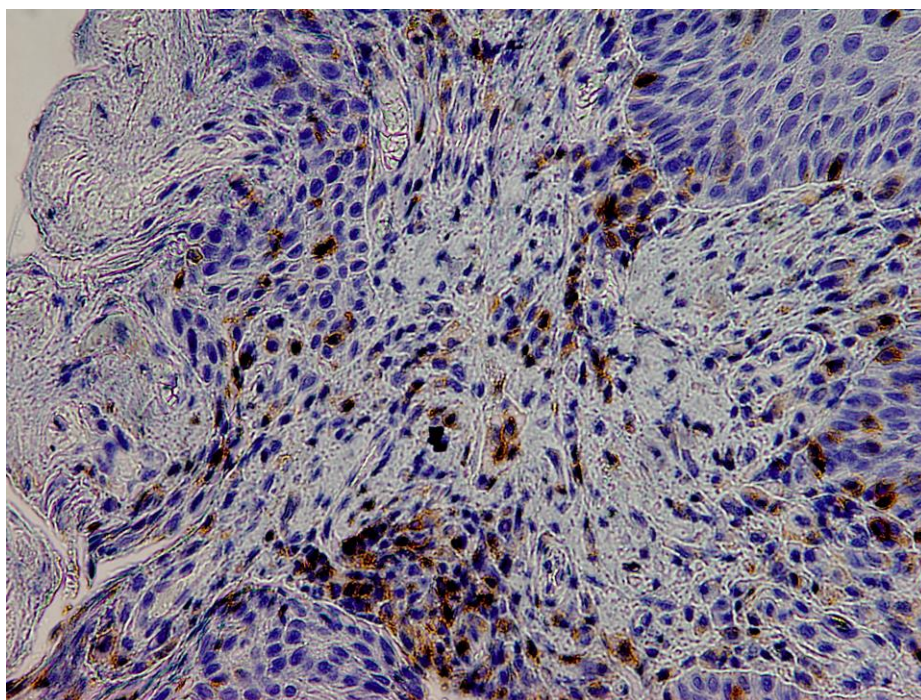

**Figure S4.** Example sample of immuno-staining for B-lymphocytes in non-sensitised patient (Expression of CD20 molecule (B-lymphocytes) is in brown).

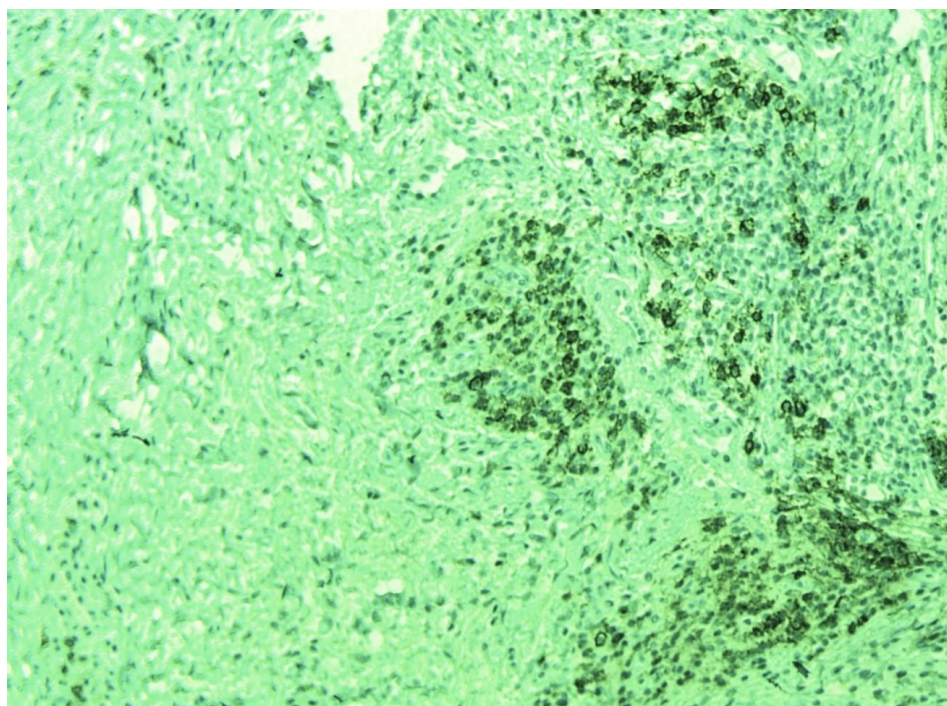

**Figure S5.** Example sample of immuno-staining for plasma cells in non-sensitised patient (Expression of CD138 molecule (plasma cells) is in brown).
